# Supplementary material
Source: HighWire-hosted journal article supplement (https://www.ajnr.org/highwire/filestream/76912/field_highwire_adjunct_files/0/19-01261.pdf)
Supplement: 19-01261.pdf [file 19-01261.pdf]

**On-line Table 1: Main MR imaging protocols used in the study across hospitals**

| MR Imaging Sequence                      | Data-Acquisition Parameters                                            |
|------------------------------------------|------------------------------------------------------------------------|
| Xiangya Hospital/Second Xiangya Hospital |                                                                        |
| 3T Trio                                  |                                                                        |
| T2-weighted TSE                          | TR/TE = 6400/100 ms, section thickness = 5 mm, matrix size = 128 × 128 |
| T1-weighted SE with gadolinium contrast  | TR/TE = 700/10 ms, section thickness = 5 mm, matrix size = 128 × 128   |
| DWI                                      | TR/TE = 5780/60 ms, section thickness = 5 mm, matrix size = 128 × 128  |
| 1.5T Avanto                              |                                                                        |
| T2-weighted TSE                          | TR/TE = 6800/100 ms, section thickness = 5 mm, matrix size = 128 × 128 |
| T1-weighted SE with gadolinium contrast  | TR/TE = 683/15 ms, section thickness = 5 mm, matrix size = 128 × 128   |
| DWI                                      | TR/TE = 8000/95 ms, section thickness = 5 mm, matrix size = 128 × 128  |
| Hunan Children's Hospital                |                                                                        |
| 3T Achieva                               |                                                                        |
| T2-weighted TSE                          | TR/TE = 5260/110 ms, section thickness = 5 mm, matrix size = 256 × 256 |
| T1-weighted SE with gadolinium contrast  | TR/TE = 650/10 ms, section thickness = 5 mm, matrix size = 256 × 256   |
| DWI                                      | TR/TE = 8100/92 ms, section thickness = 5 mm, matrix size = 256 × 256  |
| Hunan Provincial People's Hospital       |                                                                        |
| 1.5T Avanto                              |                                                                        |
| T2-weighted TSE                          | TR/TE = 5540/110 ms, section thickness = 5 mm, matrix size = 128 × 128 |
| T1-weighted SE with gadolinium contrast  | TR/TE = 650/15 ms, section thickness = 5 mm, matrix size = 128 × 128   |
| DWI                                      | TR/TE = 8200/94 ms, section thickness = 5 mm, matrix size = 128 × 128  |

Note:—SE indicates spin-echo.

**On-line Table 2: Abbreviations and names of classifiers and feature selection methods**

| Classifier Acronym | Classifier Name              | Feature-Selection Method Acronym | Feature-Selection Method Name               |
|--------------------|------------------------------|----------------------------------|---------------------------------------------|
| Nnet               | Neural network               | CHSQ                             | $\chi^2$ score                              |
| DT                 | Decision tree                | ANOVA                            | Analysis of variance                        |
| BST                | Boosting                     | TSCR                             | T test score                                |
| BY                 | Bayesian                     | FSCR                             | Fisher score                                |
| BAG                | Bagging                      | RELF                             | Relief                                      |
| RF                 | Random forest                | WLCX                             | Wilcoxon                                    |
| SVM                | Support vector machine       | MIFS                             | Mutual information feature selection        |
| LDA                | Linear discriminant analysis | MRMR                             | Minimum redundancy/Maximum relevance        |
| KNN                | k-nearest neighbors          | CIFE                             | Conditional infomax feature selection       |
| GLM                | Generalized Linear Model     | JMI                              | Joint mutual information                    |
|                    |                              | CMIM                             | Conditional mutual information maximization |
|                    |                              | ICAP                             | Interaction capping                         |
|                    |                              | DISR                             | Double input symmetric relevance            |
|                    |                              | MIM                              | Mutual information maximization             |

**On-line Table 3: Stability of classifiers using RSD% of AUC<sup>a</sup>**

| Classifiers | RSD% |
|-------------|------|
| GLM         | 2.22 |
| LDA         | 2.91 |
| KNN         | 3.92 |
| DT          | 6.25 |
| BY          | 3.30 |
| SVM         | 9.57 |
| BAG         | 3.99 |
| Nnet        | 5.64 |
| RF          | 3.68 |
| BST         | 6.29 |

Note:—RSD% indicates relative SD percentage.

<sup>a</sup> Each classifier was trained and tested on different subsamples of the data 100 times, and RSD% was calculated by the SD of AUC divided by the mean of AUC times 100.

**On-line Table 4: Comparison of 10 TPOT models for multiclass classification on the training set**

| Model Index | Parameters                                                                                                                                                                                                    | Mirco-Averaged AUC |
|-------------|---------------------------------------------------------------------------------------------------------------------------------------------------------------------------------------------------------------|--------------------|
| 1           | LogisticRegression(LogisticRegression(Normalizer(Binarizer(input_matrix, threshold =1.0), norm=max), C = 5.0, dual=False, penalty=l1), C = 20.0, dual=True, penalty=l2)                                       | 0.92               |
| 2           | LogisticRegression(RobustScaler(input_matrix), C = 20.0, dual=False, penalty=l2)                                                                                                                              | 0.92               |
| 3           | KNeighborsClassifier(SelectPercentile(MaxAbsScaler(input_matrix), percentile =3), n_neighbors = 7, P = 1, weights=uniform)                                                                                    | 0.90               |
| 4           | LogisticRegression(input_matrix, C = 10.0, dual=False, penalty=l1)                                                                                                                                            | 0.88               |
| 5           | KNeighborsClassifier(MaxAbsScaler(DecisionTreeClassifier(GaussianNB(input_matrix), criterion=gini, max_depth = 10, min_samples_leaf = 13, min_samples_split = 7)), n_neighbors = 11, P = 1, weights=distance) | 0.91               |
| 6           | BernoulliNB(ZeroCount(input_matrix), alpha =0.1, fit_prior=True)                                                                                                                                              | 0.87               |
| 7           | LogisticRegression(DecisionTreeClassifier(input_matrix, criterion=gini, max_depth = 3, min_samples_leaf = 20, min_samples_split = 6), C = 15.0, dual=False, penalty=l1)                                       | 0.88               |
| 8           | LogisticRegression(BernoulliNB(MinMaxScaler(input_matrix),alpha =1.0, fit_prior=False), C = 10.0, dual=False, penalty=l2)                                                                                     | 0.93               |
| 9           | LogisticRegression(MaxAbsScaler(input_matrix), C = 5.0, dual=False, penalty=l2)                                                                                                                               | 0.92               |
| 10          | BernoulliNB(input_matrix, alpha =0.1, fit_prior=True)                                                                                                                                                         | 0.87               |

**On-line Table 5: Top 20 radiomics features for models by TPOT for multiclass classification**

| Selected Feature No. | Feature Description                               | Technique of Feature |
|----------------------|---------------------------------------------------|----------------------|
| 31                   | locInt_3D_Floc_peak_global_scale3                 | ADC                  |
| 34                   | stats_3D_Fstat_skew_scale3                        | ADC                  |
| 37                   | stats_3D_Fstat_min_scale3                         | ADC                  |
| 3095                 | morph_3D_Fmorph_sphericity_scale3                 | ADC                  |
| 3098                 | morph_3D_Fmorph_diam_scale3                       | TIC                  |
| 3101                 | morph_3D_Fmorph_pca_least_scale3                  | TIC                  |
| 5201                 | gldzm_3D_Fdzm_lgze_scale2_algoFBNequal64_bin16    | TIC                  |
| 5265                 | gldzm_3D_Fdzm_lgze_scale3_algoFBN_bin16           | TIC                  |
| 5278                 | gldzm_3D_Fdzm_zd_entr_scale3_algoFBN_bin16        | TIC                  |
| 5329                 | gldzm_3D_Fdzm_lgze_scale3_algoFBNequal64_bin16    | TIC                  |
| 5342                 | gldzm_3D_Fdzm_zd_entr_scale3_algoFBNequal64_bin16 | TIC                  |
| 5345                 | gldzm_3D_Fdzm_lgze_scale3_algoFBNequal64_bin32    | TIC                  |
| 5361                 | gldzm_3D_Fdzm_lgze_scale3_algoFBNequal64_bin64    | TIC                  |
| 5393                 | gldzm_3D_Fdzm_lgze_scale4_algoFBN_bin16           | TIC                  |
| 5406                 | gldzm_3D_Fdzm_zd_entr_scale4_algoFBN_bin16        | TIC                  |
| 5409                 | gldzm_3D_Fdzm_lgze_scale4_algoFBN_bin32           | TIC                  |
| 6159                 | ngldm_3D_Fngl_lde_scale4_algoFBNequal64_bin64     | TIC                  |
| 6162                 | ngldm_3D_Fngl_hgce_scale4_algoFBNequal64_bin64    | TIC                  |
| 6165                 | ngldm_3D_Fngl_hdlge_scale4_algoFBNequal64_bin64   | TIC                  |
| 9193                 | ngldm_3D_Fngl_dcnu_norm_scale4_algoFBN_bin64      | T2WI                 |

**Note:**—TIC indicates TIWI contrast-enhanced sequence.

**On-line Table 6: Top 20 radiomics features for models by CHSQ and GLM for multiclass classification**

| Selected Feature No. | Feature Description                                   | Technique of Feature |
|----------------------|-------------------------------------------------------|----------------------|
| 839                  | glcm_3Dmrg__Fcm_sum_entr__scale4_algoFBNequal64_bin32 | ADC                  |
| 1373                 | glrlm_3Dmrg__Frlm_gl_var__scale4_algoFBNequal64_bin32 | ADC                  |
| 1389                 | glrlm_3Dmrg__Frlm_gl_var__scale4_algoFBNequal64_bin64 | ADC                  |
| 1885                 | glszm_3D__Fszm_gl_var__scale4_algoFBNequal64_bin32    | ADC                  |
| 1901                 | glszm_3D__Fszm_gl_var__scale4_algoFBNequal64_bin64    | ADC                  |
| 1981                 | gldzm_3D__Fdzm_gl_var__scale1_algoFBNequal64_bin8     | ADC                  |
| 2013                 | gldzm_3D__Fdzm_gl_var__scale1_algoFBNequal64_bin32    | ADC                  |
| 2109                 | gldzm_3D__Fdzm_gl_var__scale2_algoFBNequal64_bin8     | ADC                  |
| 2125                 | gldzm_3D__Fdzm_gl_var__scale2_algoFBNequal64_bin16    | ADC                  |
| 2127                 | gldzm_3D__Fdzm_zd_entr__scale2_algoFBNequal64_bin16   | ADC                  |
| 7264                 | glrlm_3Dmrg__Frlm_lgre__scale2_algoFBNequal64_bin16   | T2WI                 |
| 8704                 | ngtdm_3D__Fngt_strength__scale3_algoFBNequal64_bin32  | T2WI                 |
| 8720                 | ngtdm_3D__Fngt_coarseness__scale4_algoFBN_bin32       | T2WI                 |
| 8816                 | ngldm_3D__Fngl_lgce__scale1_algoFBNequal64_bin8       | T2WI                 |
| 8832                 | ngldm_3D__Fngl_lgce__scale1_algoFBNequal64_bin16      | T2WI                 |
| 8848                 | ngldm_3D__Fngl_lgce__scale1_algoFBNequal64_bin32      | T2WI                 |
| 8864                 | ngldm_3D__Fngl_lgce__scale1_algoFBNequal64_bin64      | T2WI                 |
| 8960                 | ngldm_3D__Fngl_lgce__scale2_algoFBNequal64_bin16      | T2WI                 |
| 8976                 | ngldm_3D__Fngl_lgce__scale2_algoFBNequal64_bin32      | T2WI                 |
| 8992                 | ngldm_3D__Fngl_lgce__scale2_algoFBNequal64_bin64      | T2WI                 |

**On-line Table 7: Comparison of TPOT models for binary classification of MB versus non-MB, EP versus non-EP, and PA versus non-PA on the training set**

| Model Index | MB vs Non-MB                                                                                                                                             |       | EP vs Non-EP                                                                                                                                              |       | PA vs Non-PA                                                                                                                                                                                                                                         |       |
|-------------|----------------------------------------------------------------------------------------------------------------------------------------------------------|-------|-----------------------------------------------------------------------------------------------------------------------------------------------------------|-------|------------------------------------------------------------------------------------------------------------------------------------------------------------------------------------------------------------------------------------------------------|-------|
|             | Parameters                                                                                                                                               | AUC   | Parameters                                                                                                                                                | AUC   | Parameters                                                                                                                                                                                                                                           | AUC   |
| 1           | BernoulliNB(GaussianNB(MaxAbsScaler(input_matrix), alpha=0.1, fit_prior=False))                                                                          | 0.917 | LogisticRegression(MaxAbsScaler(input_matrix), C=0.01, dual=False, penalty=l2)                                                                            | 0.730 | BernoulliNB(LogisticRegression(input_matrix, dual=False, penalty=l1), alpha=0.001, fit_prior=True)                                                                                                                                                   | 0.933 |
| 2           | BernoulliNB(GaussianNB(Binarizer(input_matrix, threshold=0.2)), alpha=1.0, fit_prior=True)                                                               | 0.936 | DecisionTreeClassifier(input_matrix, criterion=entropy, max_depth=10, min_samples_leaf=18, min_samples_split=14)                                          | 0.697 | KNeighborsClassifier(SelectFwe(MaxAbsScaler(input_matrix), alpha=0.032), n_neighbors=29, P=2, weights=distance)                                                                                                                                      | 0.955 |
| 3           | BernoulliNB(DecisionTreeClassifier(input_matrix, criterion=entropy, max_depth=7, min_samples_leaf=9, min_samples_split=6), alpha=0.001, fit_prior=False) | 0.916 | LogisticRegression(MinMaxScaler(input_matrix), C=10.0, dual=False, penalty=l2)                                                                            | 0.789 | BernoulliNB(input_matrix, alpha=1.0, fit_prior=True)                                                                                                                                                                                                 | 0.914 |
| 4           | KNeighborsClassifier(Binarizer(StandardScaler(input_matrix), threshold=0.15000000000000002), n_neighbors=4, P=1, weights=uniform)                        | 0.931 | DecisionTreeClassifier(PCA(input_matrix, iterated_power=8, svd_solver=randomized), criterion=gini, max_depth=4, min_samples_leaf=19, min_samples_split=4) | 0.698 | MultinomialNB(SelectPercentile(BernoulliNB(MinMaxScaler(input_matrix), alpha=0.01, fit_prior=True), percentile=3)), alpha=100.0, fit_prior=True)                                                                                                     | 0.921 |
| 5           | KNeighborsClassifier(MinMaxScaler(input_matrix), n_neighbors=26, P=1, weights=distance)                                                                  | 0.945 | BernoulliNB(VarianceThreshold(input_matrix, threshold=0.05), alpha=0.01, fit_prior=True)                                                                  | 0.698 | KNeighborsClassifier(MaxAbsScaler(input_matrix), n_neighbors=21, P=2, weights=distance)                                                                                                                                                              | 0.952 |
| 6           | BernoulliNB(LogisticRegression(input_matrix, C=0.01, dual=False, penalty=l2), alpha=0.001, fit_prior=True)                                               | 0.923 | LogisticRegression(MinMaxScaler(BernoulliNB(input_matrix, alpha=1.0, fit_prior=False)), C=20.0, dual=False, penalty=l1)                                   | 0.830 | BernoulliNB(SelectFwe(input_matrix, alpha=0.045), alpha=0.1, fit_prior=False)                                                                                                                                                                        | 0.915 |
| 7           | BernoulliNB(VarianceThreshold(input_matrix, threshold=0.0001), alpha=1.0, fit_prior=False)                                                               | 0.904 | KNeighborsClassifier(Binarizer(input_matrix, threshold=1.0), n_neighbors=40, P=1, weights=distance)                                                       | 0.765 | LogisticRegression(StandardScaler(MaxAbsScaler(input_matrix)), C=0.5, dual=False, penalty=l2)                                                                                                                                                        | 0.963 |
| 8           | LogisticRegression(MinMaxScaler(input_matrix), C=10.0, dual=False, penalty=l1)                                                                           | 0.972 | LogisticRegression(MinMaxScaler(input_matrix), C=20.0, dual=False, penalty=l1)                                                                            | 0.839 | BernoulliNB(LogisticRegression(input_matrix, C=20.0, dual=False, penalty=l1), alpha=0.001, fit_prior=True)                                                                                                                                           | 0.936 |
| 9           | LogisticRegression(KNeighborsClassifier(Binarizer(input_matrix, threshold=1.0), n_neighbors=46, P=2, weights=uniform), C=1.0, dual=False, penalty=l1)    | 0.974 | DecisionTreeClassifier(input_matrix, criterion=entropy, max_depth=9, min_samples_leaf=18, min_samples_split=9)                                            | 0.697 | BernoulliNB(DecisionTreeClassifier(DecisionTreeClassifier(input_matrix, criterion=gini, max_depth=7, min_samples_leaf=12, min_samples_split=14), criterion=gini, max_depth=8, min_samples_leaf=12, min_samples_split=14), alpha=0.1, fit_prior=True) | 0.933 |
| 10          | BernoulliNB(LogisticRegression(input_matrix, C=15.0, dual=False, penalty=l1), alpha=0.001, fit_prior=False)                                              | 0.924 | KNeighborsClassifier(Binarizer(input_matrix, threshold=0.0), n_neighbors=72, P=1, weights=distance)                                                       | 0.730 | KNeighborsClassifier(Binarizer(input_matrix, threshold=0.15000000000000002), n_neighbors=12, P=1, weights=uniform)                                                                                                                                   | 0.954 |

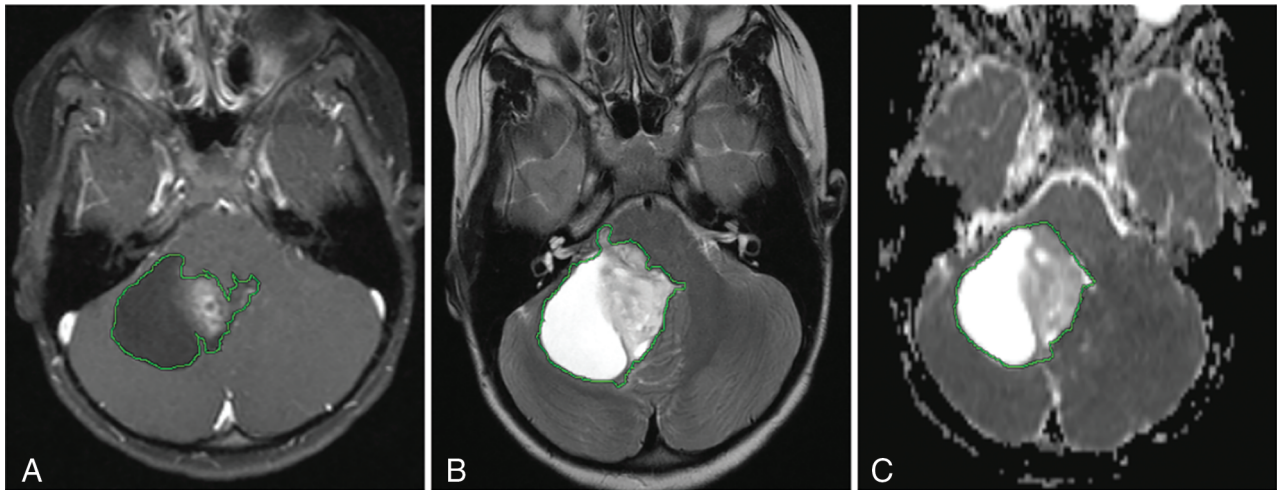

**ON-LINE FIG 1.** An example of ROI delineation in a posterior fossa tumor on T1WI contrast-enhanced sequence (A), T2WI (B), and ADC (C).

|       | GLM  | LDA  | KNN  | DT   | BY   | SVM  | BAG  | Nnet | RF   | BST  |
|-------|------|------|------|------|------|------|------|------|------|------|
| CHSQ  | 0.93 | 0.79 | 0.90 | 0.80 | 0.90 | 0.92 | 0.91 | 0.92 | 0.90 | 0.85 |
| ANOVA | 0.92 | 0.87 | 0.87 | 0.83 | 0.90 | 0.91 | 0.89 | 0.92 | 0.89 | 0.86 |
| FSCR  | 0.92 | 0.87 | 0.87 | 0.82 | 0.90 | 0.91 | 0.91 | 0.92 | 0.89 | 0.86 |
| RELF  | 0.92 | 0.85 | 0.89 | 0.80 | 0.90 | 0.92 | 0.90 | 0.92 | 0.89 | 0.88 |
| WLCX  | 0.79 | 0.59 | 0.67 | 0.66 | 0.67 | 0.71 | 0.74 | 0.80 | 0.69 | 0.72 |
| MIM   | 0.84 | 0.72 | 0.81 | 0.69 | 0.78 | 0.82 | 0.82 | 0.86 | 0.82 | 0.78 |
| MIFS  | 0.88 | 0.66 | 0.83 | 0.73 | 0.81 | 0.87 | 0.84 | 0.87 | 0.86 | 0.81 |
| MRMR  | 0.88 | 0.63 | 0.84 | 0.71 | 0.82 | 0.88 | 0.87 | 0.88 | 0.83 | 0.84 |
| CIFE  | 0.87 | 0.68 | 0.83 | 0.77 | 0.83 | 0.88 | 0.85 | 0.87 | 0.87 | 0.81 |
| JMI   | 0.90 | 0.74 | 0.85 | 0.73 | 0.78 | 0.86 | 0.83 | 0.91 | 0.79 | 0.81 |
| CMIM  | 0.85 | 0.75 | 0.83 | 0.74 | 0.80 | 0.83 | 0.85 | 0.86 | 0.87 | 0.82 |
| ICAP  | 0.85 | 0.75 | 0.83 | 0.74 | 0.80 | 0.83 | 0.84 | 0.86 | 0.85 | 0.82 |
| DISR  | 0.74 | 0.60 | 0.63 | 0.60 | 0.61 | 0.60 | 0.69 | 0.74 | 0.73 | 0.64 |

**A**

|       | GLM  | LDA  | KNN  | DT   | BY   | SVM  | BAG  | Nnet | RF   | BST  |
|-------|------|------|------|------|------|------|------|------|------|------|
| CHSQ  | 0.92 | 0.86 | 0.90 | 0.83 | 0.90 | 0.92 | 0.88 | 0.91 | 0.90 | 0.86 |
| ANOVA | 0.92 | 0.88 | 0.88 | 0.77 | 0.90 | 0.91 | 0.89 | 0.91 | 0.89 | 0.85 |
| FSCR  | 0.92 | 0.88 | 0.88 | 0.75 | 0.90 | 0.90 | 0.88 | 0.91 | 0.90 | 0.85 |
| RELF  | 0.92 | 0.87 | 0.89 | 0.76 | 0.90 | 0.92 | 0.88 | 0.91 | 0.90 | 0.84 |
| WLCX  | 0.70 | 0.67 | 0.59 | 0.58 | 0.56 | 0.62 | 0.70 | 0.68 | 0.68 | 0.63 |
| MIM   | 0.85 | 0.81 | 0.82 | 0.72 | 0.81 | 0.82 | 0.84 | 0.85 | 0.86 | 0.77 |
| MIFS  | 0.88 | 0.79 | 0.87 | 0.72 | 0.85 | 0.88 | 0.86 | 0.88 | 0.84 | 0.84 |
| MRMR  | 0.87 | 0.79 | 0.87 | 0.71 | 0.87 | 0.87 | 0.85 | 0.87 | 0.88 | 0.84 |
| CIFE  | 0.87 | 0.81 | 0.87 | 0.75 | 0.85 | 0.86 | 0.86 | 0.87 | 0.86 | 0.83 |
| JMI   | 0.87 | 0.81 | 0.78 | 0.66 | 0.72 | 0.80 | 0.83 | 0.87 | 0.84 | 0.81 |
| CMIM  | 0.86 | 0.83 | 0.85 | 0.74 | 0.84 | 0.85 | 0.84 | 0.87 | 0.86 | 0.80 |
| ICAP  | 0.86 | 0.83 | 0.85 | 0.73 | 0.84 | 0.84 | 0.86 | 0.87 | 0.85 | 0.80 |
| DISR  | 0.75 | 0.64 | 0.64 | 0.61 | 0.63 | 0.67 | 0.72 | 0.74 | 0.70 | 0.68 |

**B**

|       | GLM  | LDA  | KNN  | DT   | BY   | SVM  | BAG  | Nnet | RF   | BST  |
|-------|------|------|------|------|------|------|------|------|------|------|
| CHSQ  | 0.92 | 0.90 | 0.88 | 0.79 | 0.89 | 0.91 | 0.89 | 0.92 | 0.90 | 0.81 |
| ANOVA | 0.89 | 0.86 | 0.85 | 0.75 | 0.89 | 0.89 | 0.85 | 0.88 | 0.86 | 0.81 |
| FSCR  | 0.89 | 0.86 | 0.85 | 0.74 | 0.89 | 0.89 | 0.85 | 0.88 | 0.86 | 0.80 |
| RELF  | 0.91 | 0.91 | 0.91 | 0.75 | 0.90 | 0.91 | 0.88 | 0.90 | 0.90 | 0.81 |
| WLCX  | 0.62 | 0.56 | 0.56 | 0.60 | 0.58 | 0.58 | 0.63 | 0.59 | 0.58 | 0.61 |
| MIM   | 0.66 | 0.66 | 0.64 | 0.56 | 0.63 | 0.64 | 0.65 | 0.68 | 0.64 | 0.60 |
| MIFS  | 0.84 | 0.85 | 0.81 | 0.70 | 0.84 | 0.78 | 0.85 | 0.85 | 0.84 | 0.81 |
| MRMR  | 0.83 | 0.83 | 0.80 | 0.70 | 0.78 | 0.81 | 0.83 | 0.84 | 0.82 | 0.79 |
| CIFE  | 0.87 | 0.84 | 0.84 | 0.75 | 0.88 | 0.87 | 0.84 | 0.86 | 0.87 | 0.84 |
| JMI   | 0.85 | 0.84 | 0.77 | 0.68 | 0.72 | 0.83 | 0.82 | 0.87 | 0.82 | 0.77 |
| CMIM  | 0.84 | 0.80 | 0.85 | 0.68 | 0.82 | 0.83 | 0.82 | 0.84 | 0.85 | 0.78 |
| ICAP  | 0.84 | 0.80 | 0.85 | 0.68 | 0.82 | 0.83 | 0.84 | 0.84 | 0.86 | 0.78 |
| DISR  | 0.70 | 0.71 | 0.64 | 0.61 | 0.63 | 0.60 | 0.64 | 0.72 | 0.65 | 0.68 |

**C**

|       | GLM  | LDA  | KNN  | DT   | BY   | SVM  | BAG  | Nnet | RF   | BST  |
|-------|------|------|------|------|------|------|------|------|------|------|
| CHSQ  | 0.92 | 0.92 | 0.90 | 0.81 | 0.90 | 0.91 | 0.92 | 0.92 | 0.90 | 0.84 |
| ANOVA | 0.88 | 0.88 | 0.86 | 0.79 | 0.88 | 0.88 | 0.84 | 0.88 | 0.85 | 0.82 |
| FSCR  | 0.88 | 0.88 | 0.86 | 0.75 | 0.88 | 0.88 | 0.83 | 0.88 | 0.86 | 0.82 |
| RELF  | 0.91 | 0.90 | 0.89 | 0.79 | 0.91 | 0.90 | 0.90 | 0.90 | 0.89 | 0.86 |
| WLCX  | 0.62 | 0.62 | 0.56 | 0.60 | 0.61 | 0.60 | 0.60 | 0.61 | 0.61 | 0.59 |
| MIM   | 0.67 | 0.63 | 0.62 | 0.58 | 0.63 | 0.59 | 0.63 | 0.68 | 0.66 | 0.66 |
| MIFS  | 0.62 | 0.61 | 0.60 | 0.54 | 0.66 | 0.57 | 0.58 | 0.63 | 0.56 | 0.59 |
| MRMR  | 0.64 | 0.63 | 0.60 | 0.52 | 0.65 | 0.60 | 0.58 | 0.65 | 0.59 | 0.61 |
| CIFE  | 0.80 | 0.79 | 0.80 | 0.68 | 0.81 | 0.79 | 0.82 | 0.82 | 0.77 | 0.78 |
| JMI   | 0.81 | 0.82 | 0.75 | 0.69 | 0.72 | 0.82 | 0.81 | 0.81 | 0.79 | 0.79 |
| CMIM  | 0.81 | 0.78 | 0.85 | 0.71 | 0.80 | 0.81 | 0.79 | 0.81 | 0.82 | 0.73 |
| ICAP  | 0.81 | 0.78 | 0.85 | 0.73 | 0.80 | 0.80 | 0.79 | 0.81 | 0.80 | 0.73 |
| DISR  | 0.65 | 0.65 | 0.67 | 0.58 | 0.64 | 0.64 | 0.62 | 0.66 | 0.65 | 0.58 |

**D**

**ON-LINE FIG 2.** Heatmap (micro-averaged AUC) of multiclass classification on the training set when 100 (A), 50 (B), 20 (C), and 10 (D) features are selected. WLCX, Wilcoxon. See On-line Table 2 for expansion of other acronyms.

|       | GLM  | LDA  | KNN  | DT   | BY   | SVM  | BAG  | Nnet | RF   | BST  |
|-------|------|------|------|------|------|------|------|------|------|------|
| CHSQ  | 0.96 | 0.83 | 0.92 | 0.83 | 0.91 | 0.97 | 0.95 | 0.96 | 0.94 | 0.96 |
| ANOVA | 0.97 | 0.88 | 0.92 | 0.82 | 0.94 | 0.97 | 0.93 | 0.97 | 0.94 | 0.93 |
| FSCR  | 0.97 | 0.88 | 0.92 | 0.81 | 0.94 | 0.97 | 0.93 | 0.97 | 0.95 | 0.93 |
| RELF  | 0.96 | 0.86 | 0.92 | 0.81 | 0.94 | 0.96 | 0.94 | 0.95 | 0.95 | 0.91 |
| WLCX  | 0.91 | 0.72 | 0.84 | 0.72 | 0.83 | 0.88 | 0.86 | 0.90 | 0.87 | 0.86 |
| MIM   | 0.90 | 0.73 | 0.86 | 0.74 | 0.88 | 0.87 | 0.87 | 0.91 | 0.85 | 0.88 |
| MIFS  | 0.89 | 0.65 | 0.84 | 0.75 | 0.86 | 0.89 | 0.88 | 0.89 | 0.86 | 0.78 |
| MRMR  | 0.89 | 0.64 | 0.86 | 0.73 | 0.85 | 0.90 | 0.88 | 0.88 | 0.87 | 0.81 |
| CIFE  | 0.89 | 0.68 | 0.84 | 0.79 | 0.87 | 0.89 | 0.87 | 0.89 | 0.90 | 0.85 |
| JMI   | 0.91 | 0.75 | 0.77 | 0.70 | 0.77 | 0.89 | 0.84 | 0.89 | 0.82 | 0.87 |
| CMIM  | 0.90 | 0.74 | 0.86 | 0.72 | 0.87 | 0.88 | 0.88 | 0.90 | 0.88 | 0.91 |
| ICAP  | 0.90 | 0.74 | 0.86 | 0.74 | 0.87 | 0.88 | 0.85 | 0.90 | 0.89 | 0.91 |
| DISR  | 0.67 | 0.56 | 0.61 | 0.58 | 0.57 | 0.66 | 0.59 | 0.69 | 0.62 | 0.64 |

A

|       | GLM  | LDA  | KNN  | DT   | BY   | SVM  | BAG  | Nnet | RF   | BST  |
|-------|------|------|------|------|------|------|------|------|------|------|
| CHSQ  | 0.96 | 0.92 | 0.93 | 0.84 | 0.94 | 0.97 | 0.94 | 0.95 | 0.93 | 0.94 |
| ANOVA | 0.96 | 0.94 | 0.93 | 0.82 | 0.94 | 0.96 | 0.93 | 0.96 | 0.93 | 0.92 |
| FSCR  | 0.96 | 0.94 | 0.93 | 0.83 | 0.94 | 0.96 | 0.94 | 0.96 | 0.94 | 0.92 |
| RELF  | 0.96 | 0.94 | 0.94 | 0.86 | 0.95 | 0.97 | 0.94 | 0.95 | 0.94 | 0.92 |
| WLCX  | 0.87 | 0.83 | 0.78 | 0.69 | 0.80 | 0.83 | 0.80 | 0.85 | 0.86 | 0.85 |
| MIM   | 0.90 | 0.85 | 0.87 | 0.72 | 0.87 | 0.88 | 0.85 | 0.90 | 0.87 | 0.91 |
| MIFS  | 0.90 | 0.79 | 0.88 | 0.65 | 0.89 | 0.90 | 0.86 | 0.89 | 0.88 | 0.81 |
| MRMR  | 0.89 | 0.79 | 0.87 | 0.69 | 0.90 | 0.90 | 0.86 | 0.87 | 0.85 | 0.84 |
| CIFE  | 0.90 | 0.79 | 0.88 | 0.70 | 0.90 | 0.91 | 0.86 | 0.90 | 0.85 | 0.81 |
| JMI   | 0.90 | 0.85 | 0.83 | 0.80 | 0.78 | 0.90 | 0.86 | 0.90 | 0.85 | 0.86 |
| CMIM  | 0.90 | 0.86 | 0.88 | 0.73 | 0.89 | 0.89 | 0.84 | 0.92 | 0.83 | 0.89 |
| ICAP  | 0.90 | 0.86 | 0.88 | 0.73 | 0.89 | 0.89 | 0.85 | 0.92 | 0.87 | 0.89 |
| DISR  | 0.67 | 0.63 | 0.56 | 0.54 | 0.55 | 0.69 | 0.62 | 0.69 | 0.58 | 0.64 |

B

|       | GLM  | LDA  | KNN  | DT   | BY   | SVM  | BAG  | Nnet | RF   | BST  |
|-------|------|------|------|------|------|------|------|------|------|------|
| CHSQ  | 0.96 | 0.95 | 0.95 | 0.82 | 0.95 | 0.97 | 0.92 | 0.96 | 0.93 | 0.93 |
| ANOVA | 0.96 | 0.96 | 0.90 | 0.81 | 0.95 | 0.96 | 0.89 | 0.96 | 0.90 | 0.93 |
| FSCR  | 0.96 | 0.96 | 0.90 | 0.81 | 0.95 | 0.96 | 0.90 | 0.96 | 0.91 | 0.93 |
| RELF  | 0.97 | 0.95 | 0.91 | 0.83 | 0.96 | 0.97 | 0.92 | 0.97 | 0.91 | 0.92 |
| WLCX  | 0.73 | 0.77 | 0.67 | 0.64 | 0.73 | 0.69 | 0.78 | 0.70 | 0.79 | 0.74 |
| MIM   | 0.67 | 0.71 | 0.64 | 0.55 | 0.67 | 0.66 | 0.65 | 0.68 | 0.61 | 0.56 |
| MIFS  | 0.88 | 0.87 | 0.84 | 0.68 | 0.84 | 0.88 | 0.84 | 0.88 | 0.88 | 0.75 |
| MRMR  | 0.88 | 0.88 | 0.89 | 0.75 | 0.87 | 0.88 | 0.86 | 0.89 | 0.91 | 0.86 |
| CIFE  | 0.90 | 0.87 | 0.88 | 0.72 | 0.87 | 0.90 | 0.89 | 0.90 | 0.90 | 0.86 |
| JMI   | 0.89 | 0.90 | 0.85 | 0.75 | 0.82 | 0.90 | 0.84 | 0.88 | 0.88 | 0.86 |
| CMIM  | 0.77 | 0.79 | 0.74 | 0.70 | 0.70 | 0.77 | 0.79 | 0.77 | 0.74 | 0.66 |
| ICAP  | 0.77 | 0.79 | 0.74 | 0.71 | 0.70 | 0.77 | 0.82 | 0.76 | 0.73 | 0.66 |
| DISR  | 0.56 | 0.63 | 0.51 | 0.50 | 0.52 | 0.60 | 0.57 | 0.62 | 0.61 | 0.63 |

C

|       | GLM  | LDA  | KNN  | DT   | BY   | SVM  | BAG  | Nnet | RF   | BST  |
|-------|------|------|------|------|------|------|------|------|------|------|
| CHSQ  | 0.96 | 0.96 | 0.91 | 0.87 | 0.96 | 0.96 | 0.93 | 0.96 | 0.92 | 0.94 |
| ANOVA | 0.96 | 0.96 | 0.92 | 0.79 | 0.96 | 0.96 | 0.91 | 0.96 | 0.92 | 0.92 |
| FSCR  | 0.96 | 0.96 | 0.92 | 0.80 | 0.96 | 0.96 | 0.92 | 0.96 | 0.91 | 0.92 |
| RELF  | 0.96 | 0.96 | 0.91 | 0.84 | 0.96 | 0.96 | 0.89 | 0.96 | 0.92 | 0.94 |
| WLCX  | 0.59 | 0.59 | 0.54 | 0.55 | 0.61 | 0.59 | 0.63 | 0.57 | 0.62 | 0.61 |
| MIM   | 0.67 | 0.64 | 0.63 | 0.59 | 0.64 | 0.64 | 0.63 | 0.66 | 0.61 | 0.62 |
| MIFS  | 0.59 | 0.59 | 0.57 | 0.52 | 0.60 | 0.45 | 0.53 | 0.59 | 0.54 | 0.53 |
| MRMR  | 0.54 | 0.55 | 0.41 | 0.51 | 0.56 | 0.53 | 0.54 | 0.53 | 0.49 | 0.59 |
| CIFE  | 0.84 | 0.84 | 0.82 | 0.67 | 0.79 | 0.85 | 0.79 | 0.85 | 0.79 | 0.79 |
| JMI   | 0.83 | 0.84 | 0.78 | 0.70 | 0.76 | 0.85 | 0.76 | 0.84 | 0.77 | 0.68 |
| CMIM  | 0.77 | 0.79 | 0.80 | 0.67 | 0.72 | 0.78 | 0.80 | 0.78 | 0.75 | 0.63 |
| ICAP  | 0.77 | 0.79 | 0.80 | 0.70 | 0.72 | 0.78 | 0.77 | 0.77 | 0.80 | 0.63 |
| DISR  | 0.51 | 0.63 | 0.43 | 0.50 | 0.51 | 0.50 | 0.58 | 0.51 | 0.51 | 0.64 |

D

**ON-LINE FIG 3.** Heatmap (AUC) of binary classification of MB versus non-MB on the training set when 100 (A), 50 (B), 20 (C), and 10 (D) features are selected. WLCX, Wilcoxon. See On-line Table 22 for expansion of other acronyms.

|       | GLM   | LDA   | KNN   | DT    | BY    | SVM   | BAG   | Nnet  | RF    | BST   |
|-------|-------|-------|-------|-------|-------|-------|-------|-------|-------|-------|
| CHSQ  | 0.71  | 0.56  | 0.68  | 0.58  | 0.60  | 0.63  | 0.72  | 0.70  | 0.62  | 0.71  |
| ANOVA | 0.71  | 0.62  | 0.61  | 0.64  | 0.60  | 0.64  | 0.67  | 0.72  | 0.66  | 0.71  |
| FSCR  | 0.71  | 0.62  | 0.61  | 0.63  | 0.60  | 0.64  | 0.72  | 0.73  | 0.68  | 0.71  |
| RELF  | 0.78  | 0.65  | 0.76  | 0.64  | 0.74  | 0.76  | 0.68  | 0.78  | 0.73  | 0.70  |
| WLCX  | 0.691 | 0.523 | 0.699 | 0.502 | 0.58  | 0.706 | 0.594 | 0.635 | 0.675 | 0.614 |
| MIM   | 0.659 | 0.55  | 0.629 | 0.533 | 0.581 | 0.61  | 0.575 | 0.617 | 0.681 | 0.557 |
| MIFS  | 0.646 | 0.458 | 0.641 | 0.536 | 0.621 | 0.572 | 0.609 | 0.657 | 0.659 | 0.606 |
| MRMR  | 0.647 | 0.499 | 0.655 | 0.558 | 0.616 | 0.57  | 0.65  | 0.641 | 0.595 | 0.622 |
| CIFE  | 0.635 | 0.511 | 0.652 | 0.555 | 0.583 | 0.596 | 0.61  | 0.645 | 0.677 | 0.588 |
| JMI   | 0.726 | 0.567 | 0.704 | 0.498 | 0.6   | 0.731 | 0.668 | 0.723 | 0.755 | 0.643 |
| CMIM  | 0.658 | 0.571 | 0.631 | 0.533 | 0.58  | 0.575 | 0.58  | 0.626 | 0.648 | 0.63  |
| ICAP  | 0.658 | 0.571 | 0.631 | 0.533 | 0.58  | 0.575 | 0.625 | 0.582 | 0.633 | 0.664 |
| DISR  | 0.656 | 0.494 | 0.474 | 0.556 | 0.606 | 0.594 | 0.619 | 0.612 | 0.653 | 0.578 |

A

|       | GLM   | LDA   | KNN   | DT    | BY    | SVM   | BAG   | Nnet  | RF    | BST   |
|-------|-------|-------|-------|-------|-------|-------|-------|-------|-------|-------|
| CHSQ  | 0.633 | 0.55  | 0.609 | 0.562 | 0.528 | 0.562 | 0.588 | 0.666 | 0.58  | 0.689 |
| ANOVA | 0.621 | 0.638 | 0.554 | 0.593 | 0.573 | 0.588 | 0.659 | 0.646 | 0.618 | 0.671 |
| FSCR  | 0.621 | 0.638 | 0.554 | 0.596 | 0.573 | 0.588 | 0.639 | 0.671 | 0.583 | 0.671 |
| RELF  | 0.72  | 0.654 | 0.729 | 0.569 | 0.742 | 0.716 | 0.62  | 0.747 | 0.724 | 0.664 |
| WLCX  | 0.66  | 0.662 | 0.59  | 0.512 | 0.568 | 0.728 | 0.604 | 0.596 | 0.574 | 0.583 |
| MIM   | 0.667 | 0.619 | 0.675 | 0.568 | 0.599 | 0.634 | 0.677 | 0.603 | 0.74  | 0.577 |
| MIFS  | 0.609 | 0.568 | 0.686 | 0.539 | 0.654 | 0.572 | 0.726 | 0.607 | 0.65  | 0.635 |
| MRMR  | 0.617 | 0.556 | 0.712 | 0.614 | 0.678 | 0.576 | 0.57  | 0.578 | 0.663 | 0.671 |
| CIFE  | 0.606 | 0.547 | 0.652 | 0.593 | 0.632 | 0.563 | 0.702 | 0.596 | 0.722 | 0.621 |
| JMI   | 0.776 | 0.605 | 0.756 | 0.635 | 0.642 | 0.741 | 0.638 | 0.793 | 0.683 | 0.672 |
| CMIM  | 0.678 | 0.573 | 0.692 | 0.533 | 0.609 | 0.661 | 0.594 | 0.709 | 0.705 | 0.643 |
| ICAP  | 0.678 | 0.573 | 0.692 | 0.54  | 0.609 | 0.661 | 0.615 | 0.648 | 0.699 | 0.617 |
| DISR  | 0.644 | 0.582 | 0.515 | 0.537 | 0.609 | 0.592 | 0.503 | 0.62  | 0.563 | 0.566 |

B

|       | GLM   | LDA   | KNN   | DT    | BY    | SVM   | BAG   | Nnet  | RF    | BST   |
|-------|-------|-------|-------|-------|-------|-------|-------|-------|-------|-------|
| CHSQ  | 0.532 | 0.524 | 0.569 | 0.481 | 0.51  | 0.492 | 0.607 | 0.55  | 0.623 | 0.622 |
| ANOVA | 0.624 | 0.621 | 0.65  | 0.68  | 0.584 | 0.594 | 0.674 | 0.628 | 0.654 | 0.697 |
| FSCR  | 0.624 | 0.621 | 0.65  | 0.587 | 0.584 | 0.594 | 0.692 | 0.621 | 0.678 | 0.697 |
| RELF  | 0.704 | 0.665 | 0.699 | 0.61  | 0.744 | 0.711 | 0.658 | 0.715 | 0.686 | 0.633 |
| WLCX  | 0.673 | 0.607 | 0.568 | 0.533 | 0.532 | 0.69  | 0.655 | 0.49  | 0.631 | 0.578 |
| MIM   | 0.71  | 0.628 | 0.587 | 0.543 | 0.636 | 0.592 | 0.583 | 0.704 | 0.7   | 0.581 |
| MIFS  | 0.628 | 0.62  | 0.621 | 0.626 | 0.646 | 0.57  | 0.716 | 0.632 | 0.637 | 0.715 |
| MRMR  | 0.588 | 0.529 | 0.491 | 0.559 | 0.611 | 0.49  | 0.625 | 0.578 | 0.612 | 0.631 |
| CIFE  | 0.63  | 0.532 | 0.715 | 0.519 | 0.728 | 0.54  | 0.718 | 0.669 | 0.644 | 0.648 |
| JMI   | 0.696 | 0.635 | 0.626 | 0.586 | 0.589 | 0.668 | 0.683 | 0.711 | 0.653 | 0.584 |
| CMIM  | 0.651 | 0.63  | 0.666 | 0.577 | 0.571 | 0.602 | 0.673 | 0.659 | 0.705 | 0.685 |
| ICAP  | 0.651 | 0.63  | 0.666 | 0.567 | 0.571 | 0.602 | 0.717 | 0.645 | 0.731 | 0.685 |
| DISR  | 0.568 | 0.577 | 0.523 | 0.476 | 0.575 | 0.67  | 0.562 | 0.614 | 0.562 | 0.613 |

C

|       | GLM   | LDA   | KNN   | DT    | BY    | SVM   | BAG   | Nnet  | RF    | BST   |
|-------|-------|-------|-------|-------|-------|-------|-------|-------|-------|-------|
| CHSQ  | 0.49  | 0.52  | 0.59  | 0.47  | 0.49  | 0.49  | 0.63  | 0.55  | 0.64  | 0.62  |
| ANOVA | 0.63  | 0.63  | 0.66  | 0.64  | 0.59  | 0.61  | 0.69  | 0.65  | 0.73  | 0.71  |
| FSCR  | 0.63  | 0.63  | 0.66  | 0.66  | 0.59  | 0.61  | 0.68  | 0.64  | 0.69  | 0.68  |
| RELF  | 0.68  | 0.68  | 0.68  | 0.61  | 0.70  | 0.68  | 0.66  | 0.68  | 0.67  | 0.62  |
| WLCX  | 0.63  | 0.623 | 0.621 | 0.576 | 0.529 | 0.586 | 0.639 | 0.378 | 0.606 | 0.545 |
| MIM   | 0.666 | 0.592 | 0.652 | 0.642 | 0.636 | 0.528 | 0.69  | 0.674 | 0.689 | 0.632 |
| MIFS  | 0.407 | 0.407 | 0.488 | 0.496 | 0.538 | 0.427 | 0.528 | 0.445 | 0.526 | 0.502 |
| MRMR  | 0.407 | 0.407 | 0.488 | 0.496 | 0.538 | 0.427 | 0.527 | 0.415 | 0.481 | 0.502 |
| CIFE  | 0.611 | 0.621 | 0.683 | 0.597 | 0.696 | 0.67  | 0.659 | 0.635 | 0.677 | 0.627 |
| JMI   | 0.612 | 0.679 | 0.573 | 0.557 | 0.604 | 0.664 | 0.573 | 0.629 | 0.661 | 0.558 |
| CMIM  | 0.475 | 0.561 | 0.592 | 0.592 | 0.462 | 0.599 | 0.721 | 0.52  | 0.64  | 0.463 |
| ICAP  | 0.475 | 0.561 | 0.592 | 0.585 | 0.462 | 0.599 | 0.647 | 0.541 | 0.638 | 0.542 |
| DISR  | 0.512 | 0.561 | 0.653 | 0.53  | 0.548 |       |       |       |       |       |

|       | GLM  | LDA  | KNN  | DT   | BY   | SVM  | BAG  | Nnet | RF   | BST  |
|-------|------|------|------|------|------|------|------|------|------|------|
| CHSQ  | 0.95 | 0.87 | 0.93 | 0.83 | 0.94 | 0.95 | 0.94 | 0.94 | 0.94 | 0.95 |
| ANOVA | 0.93 | 0.91 | 0.90 | 0.86 | 0.91 | 0.92 | 0.93 | 0.92 | 0.93 | 0.92 |
| FSCR  | 0.93 | 0.91 | 0.90 | 0.83 | 0.91 | 0.92 | 0.91 | 0.93 | 0.93 | 0.91 |
| RELF  | 0.94 | 0.84 | 0.90 | 0.88 | 0.92 | 0.94 | 0.95 | 0.94 | 0.93 | 0.90 |
| WLCX  | 0.90 | 0.79 | 0.82 | 0.74 | 0.72 | 0.86 | 0.89 | 0.90 | 0.87 | 0.88 |
| MIM   | 0.87 | 0.74 | 0.84 | 0.75 | 0.81 | 0.83 | 0.85 | 0.88 | 0.88 | 0.87 |
| MIFS  | 0.91 | 0.75 | 0.90 | 0.77 | 0.89 | 0.92 | 0.90 | 0.91 | 0.91 | 0.90 |
| MRMR  | 0.91 | 0.78 | 0.89 | 0.77 | 0.90 | 0.92 | 0.92 | 0.92 | 0.90 | 0.92 |
| CIFE  | 0.91 | 0.76 | 0.89 | 0.77 | 0.90 | 0.92 | 0.91 | 0.91 | 0.91 | 0.91 |
| JMI   | 0.93 | 0.77 | 0.85 | 0.68 | 0.84 | 0.87 | 0.85 | 0.92 | 0.91 | 0.89 |
| CMIM  | 0.86 | 0.78 | 0.84 | 0.76 | 0.82 | 0.84 | 0.88 | 0.87 | 0.88 | 0.88 |
| ICAP  | 0.86 | 0.78 | 0.84 | 0.75 | 0.82 | 0.84 | 0.87 | 0.88 | 0.85 | 0.88 |
| DISR  | 0.79 | 0.67 | 0.72 | 0.70 | 0.70 | 0.70 | 0.74 | 0.80 | 0.75 | 0.74 |

A

|       | GLM  | LDA  | KNN  | DT   | BY   | SVM  | BAG  | Nnet | RF   | BST  |
|-------|------|------|------|------|------|------|------|------|------|------|
| CHSQ  | 0.96 | 0.86 | 0.93 | 0.82 | 0.94 | 0.95 | 0.93 | 0.96 | 0.93 | 0.92 |
| ANOVA | 0.93 | 0.91 | 0.90 | 0.86 | 0.89 | 0.92 | 0.92 | 0.94 | 0.92 | 0.91 |
| FSCR  | 0.93 | 0.91 | 0.90 | 0.87 | 0.89 | 0.92 | 0.94 | 0.94 | 0.93 | 0.91 |
| RELF  | 0.93 | 0.89 | 0.91 | 0.83 | 0.92 | 0.94 | 0.93 | 0.92 | 0.92 | 0.90 |
| WLCX  | 0.67 | 0.69 | 0.64 | 0.66 | 0.63 | 0.74 | 0.74 | 0.68 | 0.70 | 0.77 |
| MIM   | 0.87 | 0.85 | 0.85 | 0.78 | 0.86 | 0.85 | 0.87 | 0.88 | 0.87 | 0.90 |
| MIFS  | 0.91 | 0.88 | 0.93 | 0.78 | 0.90 | 0.92 | 0.90 | 0.90 | 0.93 | 0.90 |
| MRMR  | 0.90 | 0.85 | 0.95 | 0.78 | 0.90 | 0.92 | 0.90 | 0.91 | 0.92 | 0.93 |
| CIFE  | 0.91 | 0.87 | 0.92 | 0.78 | 0.91 | 0.92 | 0.91 | 0.91 | 0.92 | 0.89 |
| JMI   | 0.87 | 0.83 | 0.78 | 0.69 | 0.80 | 0.81 | 0.79 | 0.89 | 0.78 | 0.77 |
| CMIM  | 0.87 | 0.83 | 0.87 | 0.75 | 0.84 | 0.87 | 0.88 | 0.89 | 0.88 | 0.88 |
| ICAP  | 0.87 | 0.83 | 0.87 | 0.77 | 0.84 | 0.87 | 0.88 | 0.89 | 0.88 | 0.88 |
| DISR  | 0.73 | 0.72 | 0.68 | 0.61 | 0.69 | 0.69 | 0.72 | 0.74 | 0.70 | 0.72 |

B

|       | GLM  | LDA  | KNN  | DT   | BY   | SVM  | BAG  | Nnet | RF   | BST  |
|-------|------|------|------|------|------|------|------|------|------|------|
| CHSQ  | 0.96 | 0.94 | 0.92 | 0.86 | 0.94 | 0.95 | 0.93 | 0.96 | 0.94 | 0.93 |
| ANOVA | 0.93 | 0.91 | 0.91 | 0.81 | 0.91 | 0.92 | 0.93 | 0.94 | 0.92 | 0.92 |
| FSCR  | 0.93 | 0.91 | 0.91 | 0.82 | 0.91 | 0.92 | 0.93 | 0.94 | 0.92 | 0.92 |
| RELF  | 0.93 | 0.91 | 0.92 | 0.88 | 0.92 | 0.94 | 0.94 | 0.92 | 0.92 | 0.92 |
| WLCX  | 0.52 | 0.54 | 0.50 | 0.58 | 0.55 | 0.58 | 0.53 | 0.53 | 0.59 | 0.61 |
| MIM   | 0.48 | 0.60 | 0.58 | 0.53 | 0.50 | 0.54 | 0.58 | 0.61 | 0.57 | 0.52 |
| MIFS  | 0.87 | 0.88 | 0.87 | 0.81 | 0.88 | 0.88 | 0.90 | 0.88 | 0.86 | 0.89 |
| MRMR  | 0.91 | 0.90 | 0.90 | 0.77 | 0.92 | 0.91 | 0.89 | 0.90 | 0.93 | 0.85 |
| CIFE  | 0.90 | 0.90 | 0.87 | 0.73 | 0.90 | 0.88 | 0.88 | 0.91 | 0.91 | 0.88 |
| JMI   | 0.77 | 0.76 | 0.71 | 0.61 | 0.72 | 0.72 | 0.75 | 0.79 | 0.69 | 0.68 |
| CMIM  | 0.79 | 0.82 | 0.76 | 0.67 | 0.70 | 0.77 | 0.83 | 0.84 | 0.79 | 0.77 |
| ICAP  | 0.79 | 0.82 | 0.76 | 0.72 | 0.70 | 0.77 | 0.78 | 0.83 | 0.74 | 0.77 |
| DISR  | 0.70 | 0.67 | 0.60 | 0.66 | 0.67 | 0.67 | 0.71 | 0.71 | 0.68 | 0.69 |

C

|       | GLM  | LDA  | KNN  | DT   | BY   | SVM  | BAG  | Nnet | RF   | BST  |
|-------|------|------|------|------|------|------|------|------|------|------|
| CHSQ  | 0.96 | 0.95 | 0.92 | 0.88 | 0.95 | 0.95 | 0.92 | 0.96 | 0.93 | 0.94 |
| ANOVA | 0.94 | 0.92 | 0.92 | 0.80 | 0.93 | 0.94 | 0.92 | 0.94 | 0.92 | 0.93 |
| FSCR  | 0.94 | 0.92 | 0.92 | 0.82 | 0.93 | 0.94 | 0.93 | 0.94 | 0.94 | 0.93 |
| RELF  | 0.94 | 0.93 | 0.89 | 0.83 | 0.93 | 0.94 | 0.93 | 0.93 | 0.91 | 0.91 |
| WLCX  | 0.42 | 0.44 | 0.43 | 0.49 | 0.52 | 0.51 | 0.45 | 0.48 | 0.47 | 0.43 |
| MIM   | 0.49 | 0.52 | 0.50 | 0.53 | 0.52 | 0.59 | 0.58 | 0.62 | 0.56 | 0.55 |
| MIFS  | 0.41 | 0.50 | 0.52 | 0.52 | 0.56 | 0.59 | 0.54 | 0.48 | 0.55 | 0.51 |
| MRMR  | 0.58 | 0.58 | 0.68 | 0.57 | 0.57 | 0.62 | 0.70 | 0.60 | 0.72 | 0.60 |
| CIFE  | 0.73 | 0.79 | 0.71 | 0.67 | 0.76 | 0.72 | 0.78 | 0.76 | 0.80 | 0.83 |
| JMI   | 0.70 | 0.67 | 0.63 | 0.58 | 0.69 | 0.68 | 0.69 | 0.73 | 0.65 | 0.71 |
| CMIM  | 0.75 | 0.77 | 0.72 | 0.63 | 0.74 | 0.74 | 0.77 | 0.78 | 0.76 | 0.67 |
| ICAP  | 0.75 | 0.77 | 0.72 | 0.63 | 0.74 | 0.74 | 0.77 | 0.78 | 0.73 | 0.68 |
| DISR  | 0.70 | 0.69 | 0.66 | 0.63 | 0.64 | 0.68 | 0.70 | 0.71 | 0.69 | 0.69 |

D

**ON-LINE FIG 5.** Heatmap (AUC) of binary classification of PA versus non-PA on the training set when (A), 50 (B), 20 (C), and 10 (D) features are selected. WLCX, Wilcoxon. See On-line Table 2 for expansion of other acronyms.

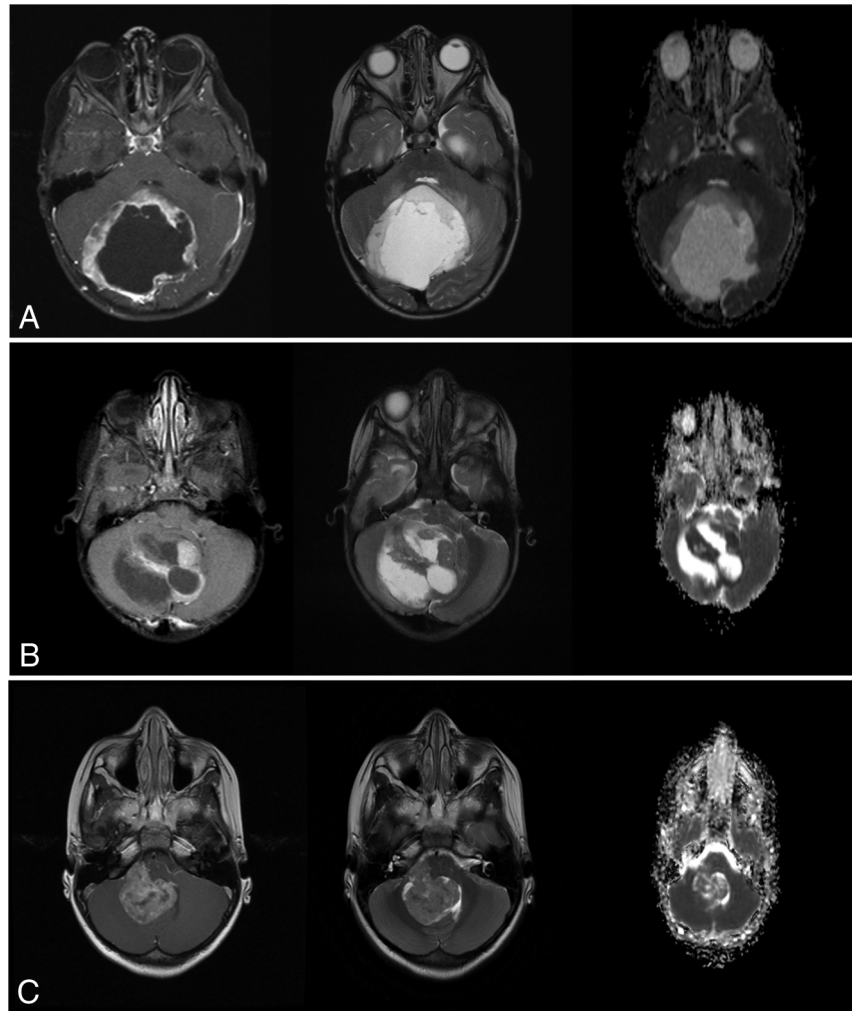

**ON-LINE FIG 6.** Examples of agreement or disagreement between the automatic machine learning TPOT model and expert review in the multi-class classification of posterior fossa tumors. *A*, An example of a posterior fossa tumor that was correctly predicted by both the automatic TPOT model and 2 experts. The example presented is a pilocytic astrocytoma showing a characteristic appearance of a cystic cerebellar lesion with a thick enhanced wall. *B*, An example of a posterior fossa tumor that was correctly predicted by the automatic TPOT model, but incorrectly by 2 experts. The example presented is a medulloblastoma showing a mixed cystic/solid enhancing mass in the cerebellum; the solid part is hypointense on ADC. *C*, An example of a posterior fossa tumor that was incorrectly predicted by an automatic TPOT model, but correctly predicted by 2 experts. The example presented is an ependymoma with a heterogeneously enhancing mass in the inferior fourth ventricle. Note extension toward the right cerebellopontine angle cistern.
